# Supplementary material
Source: Springer Nature journal article supplement (https://www.springermedizin.de/resource/supplementary/12974_2005_43_MOESM2_ESM.pdf/9600656)

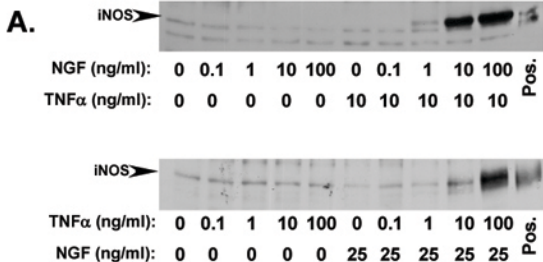

**B.**

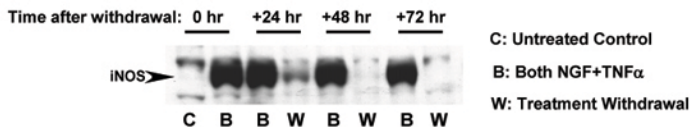

**C.**

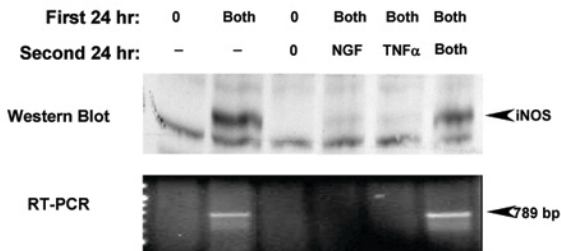

**D.**

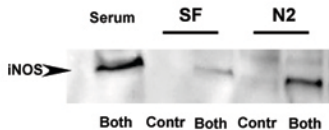

**E.**

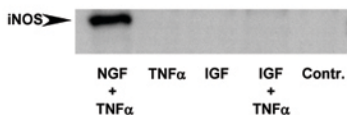

Supplement: MOESM2 [file 9600656]
